# Supplementary material for: The Composition and Metabolic Potential of the Human Small Intestinal Microbiota Within the Context of Inflammatory Bowel Disease
Source: PubMed Central journal article supplement — J Crohns Colitis. 2021 Jan 30;15(8):1326–38. doi: 10.1093/ecco-jcc/jjab020 (PMC8328293; doi:10.1093/ecco-jcc/jjab020), 2021-01-30

# Supplementary Figures

# Figure S1

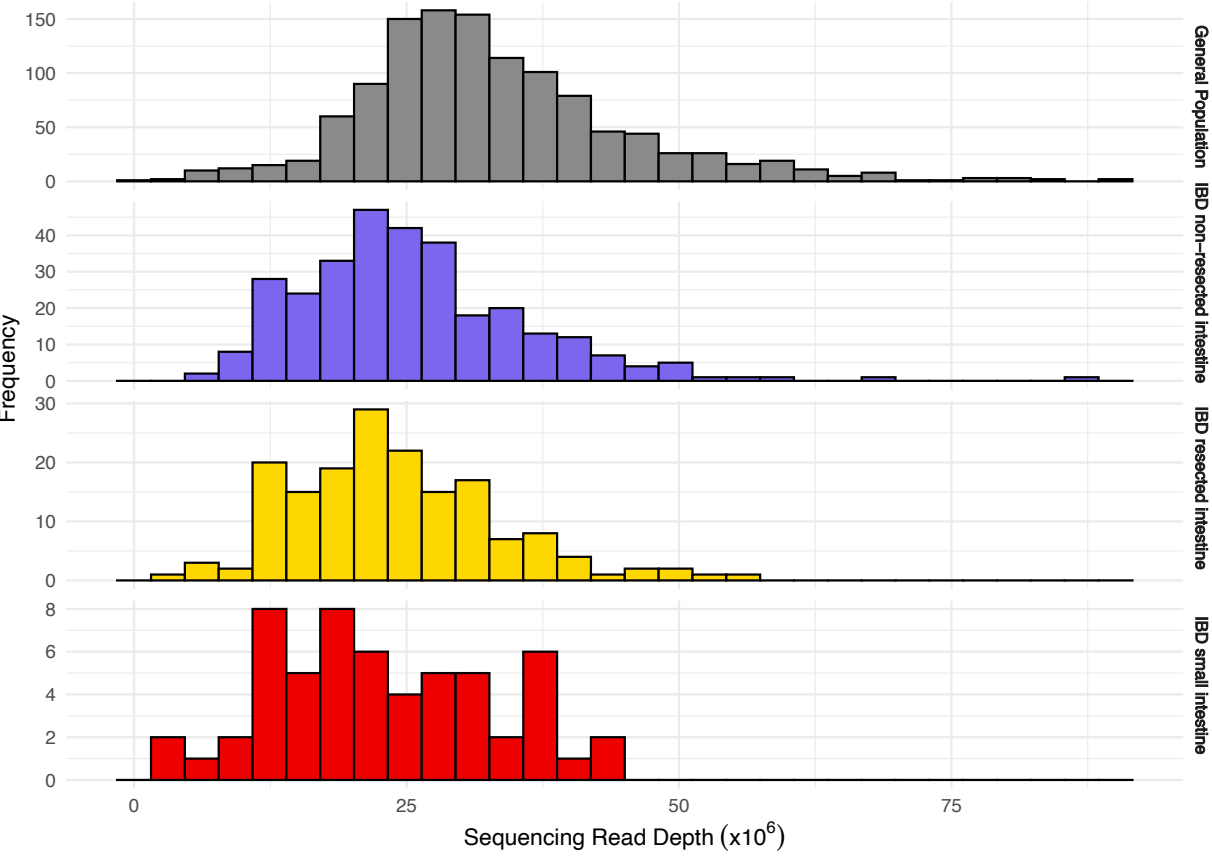

# Figure S2

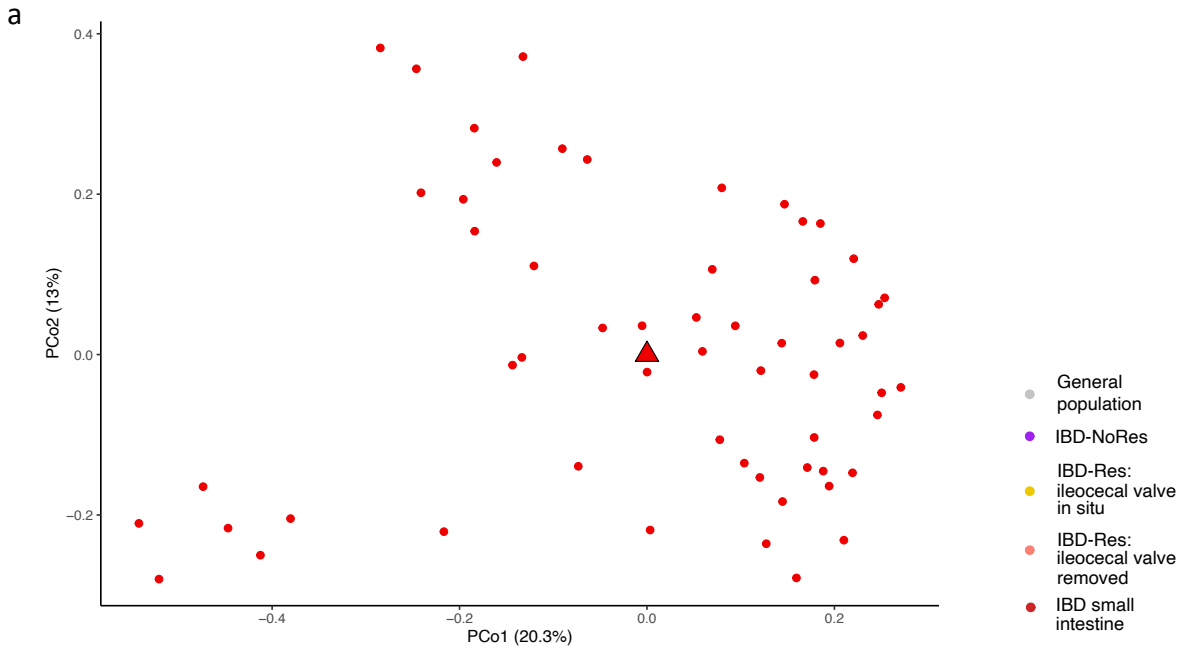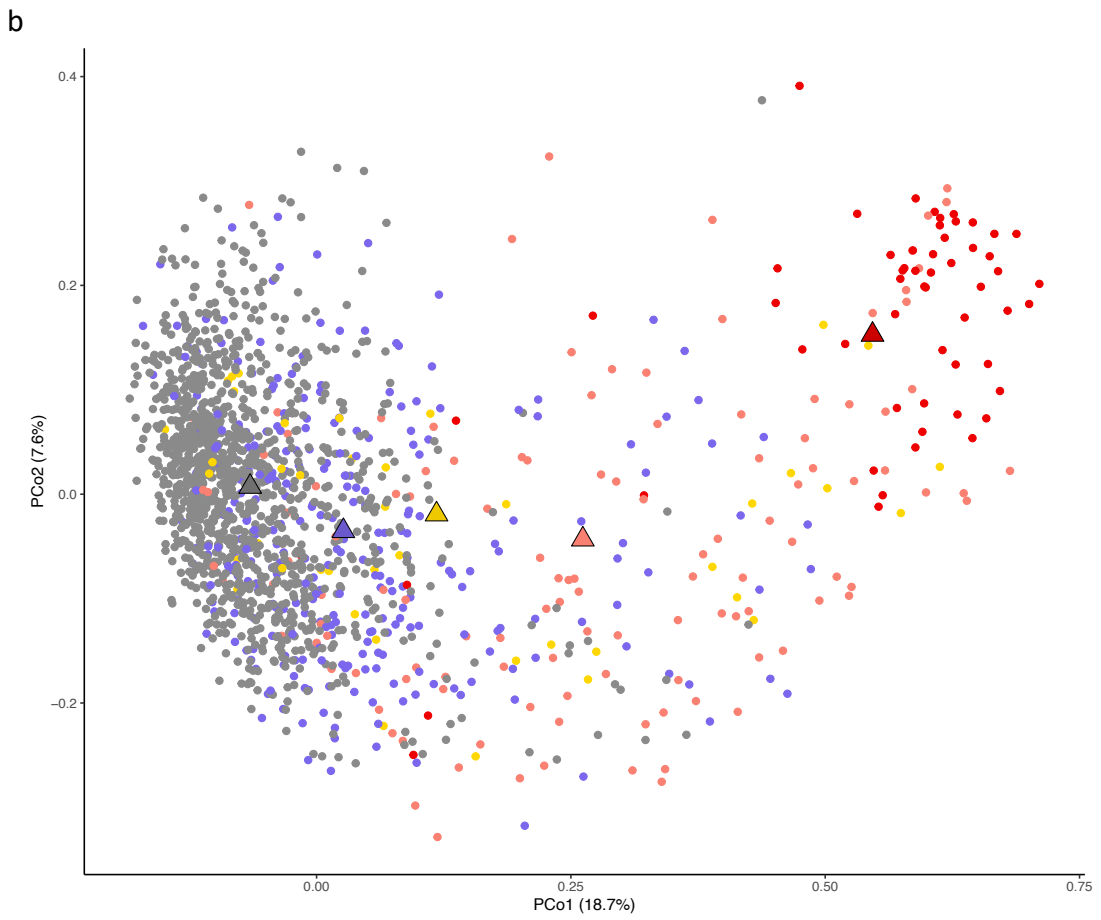

# Figure S3

**a** Phylum Composition

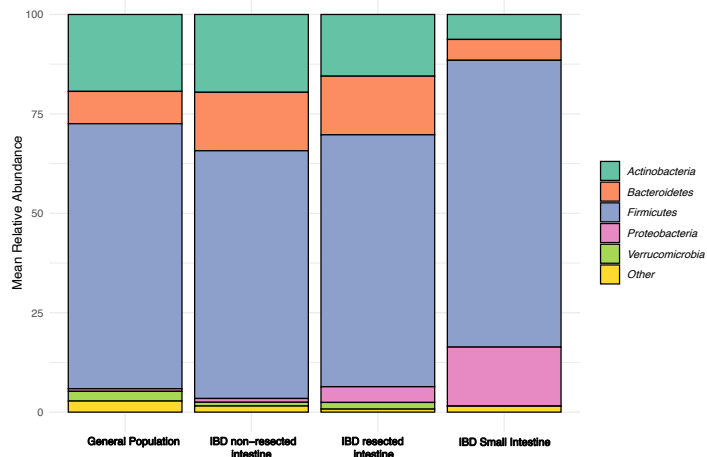

**b** Most Abundant Families in General Population

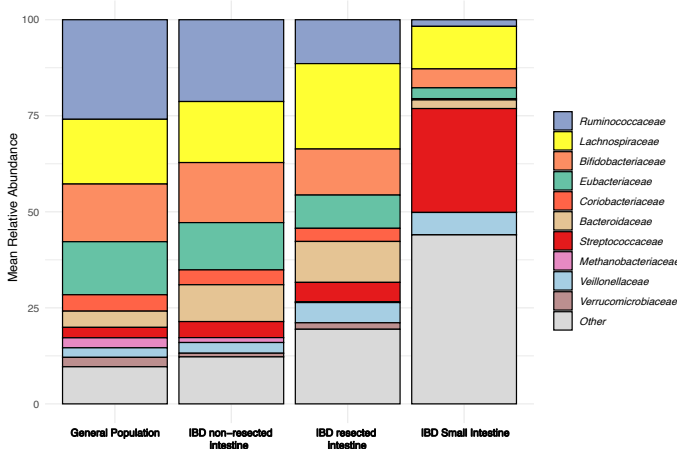

**c** Most Abundant Families in IBD Small Intestine

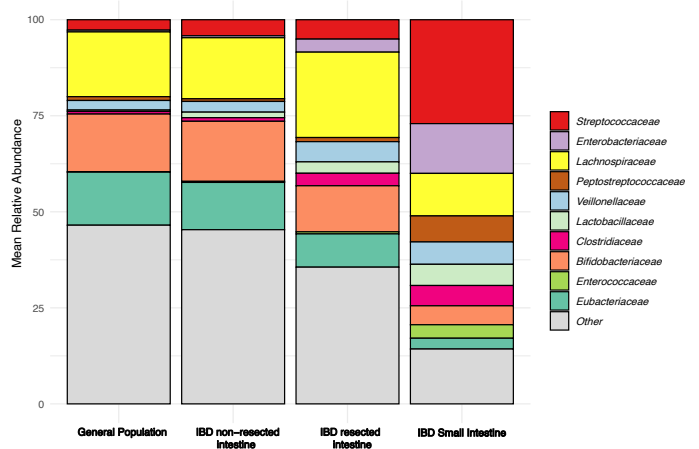

**d** Most Abundant Species in General Population

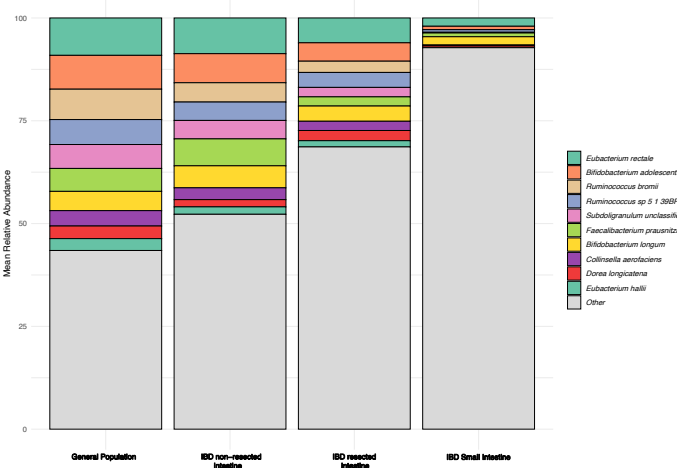

**e** Most Abundant Species in IBD Small Intestine

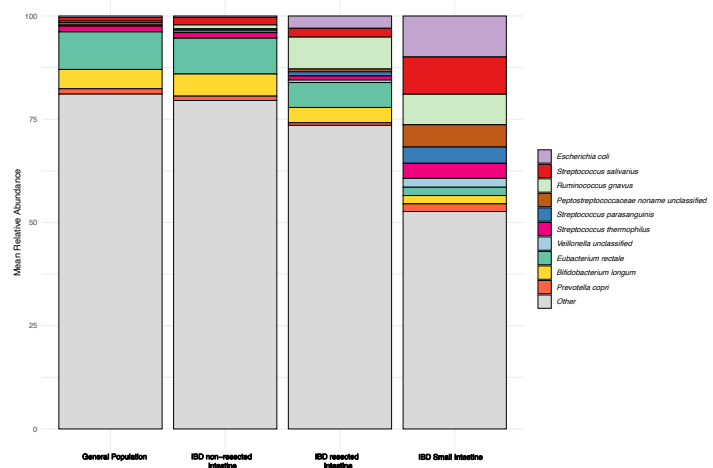

# Figure S4

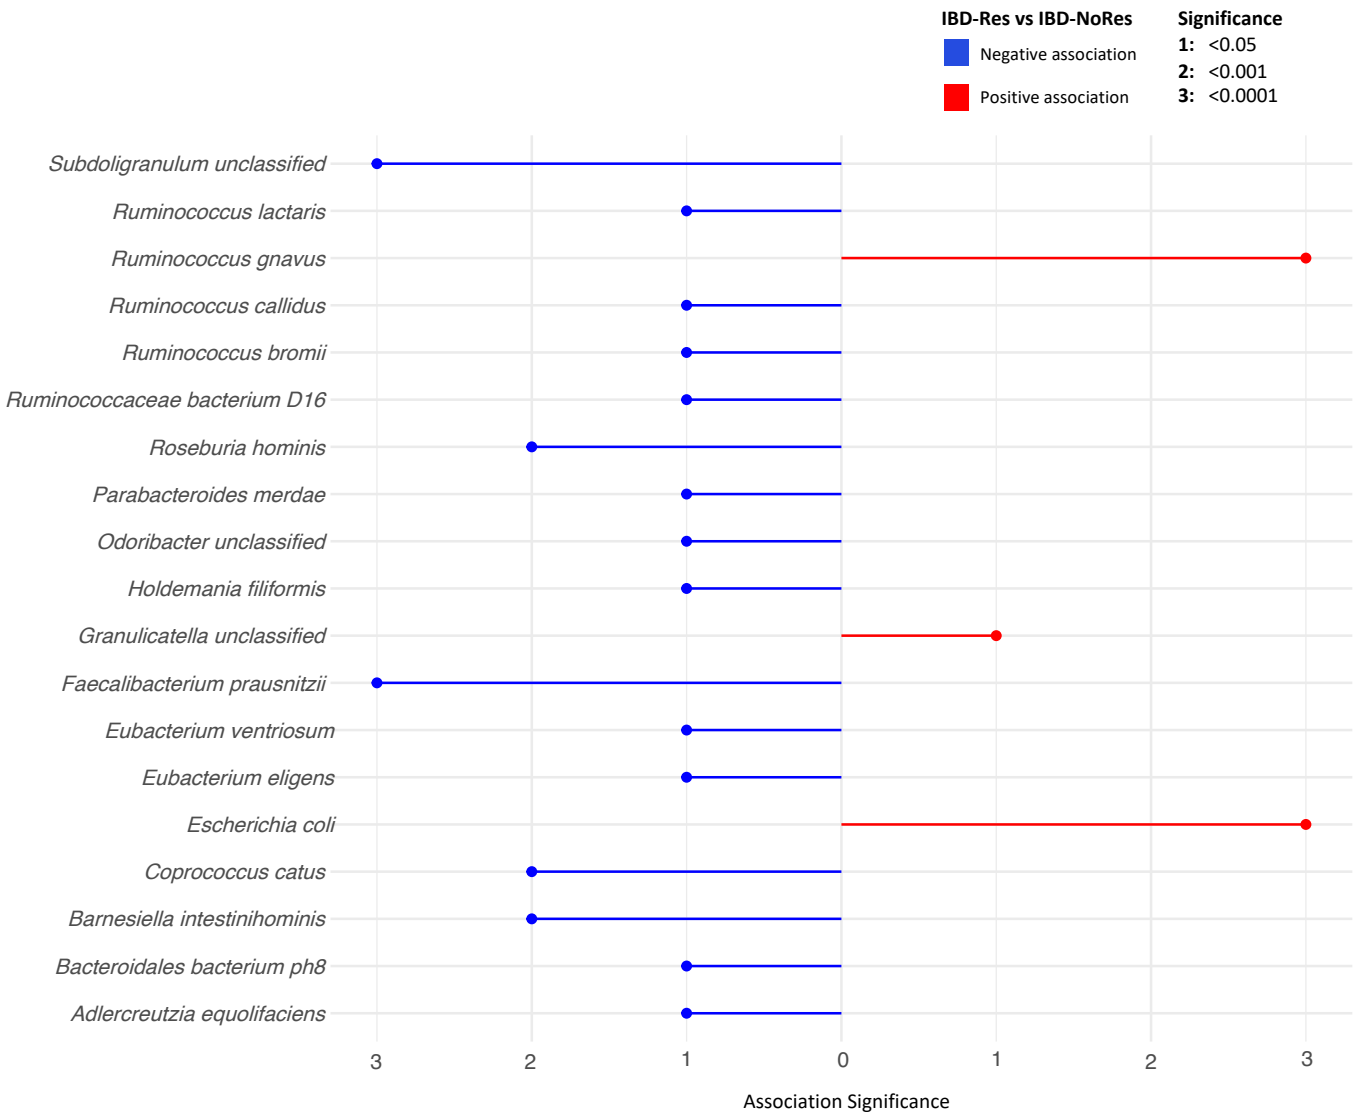

# Figure S5

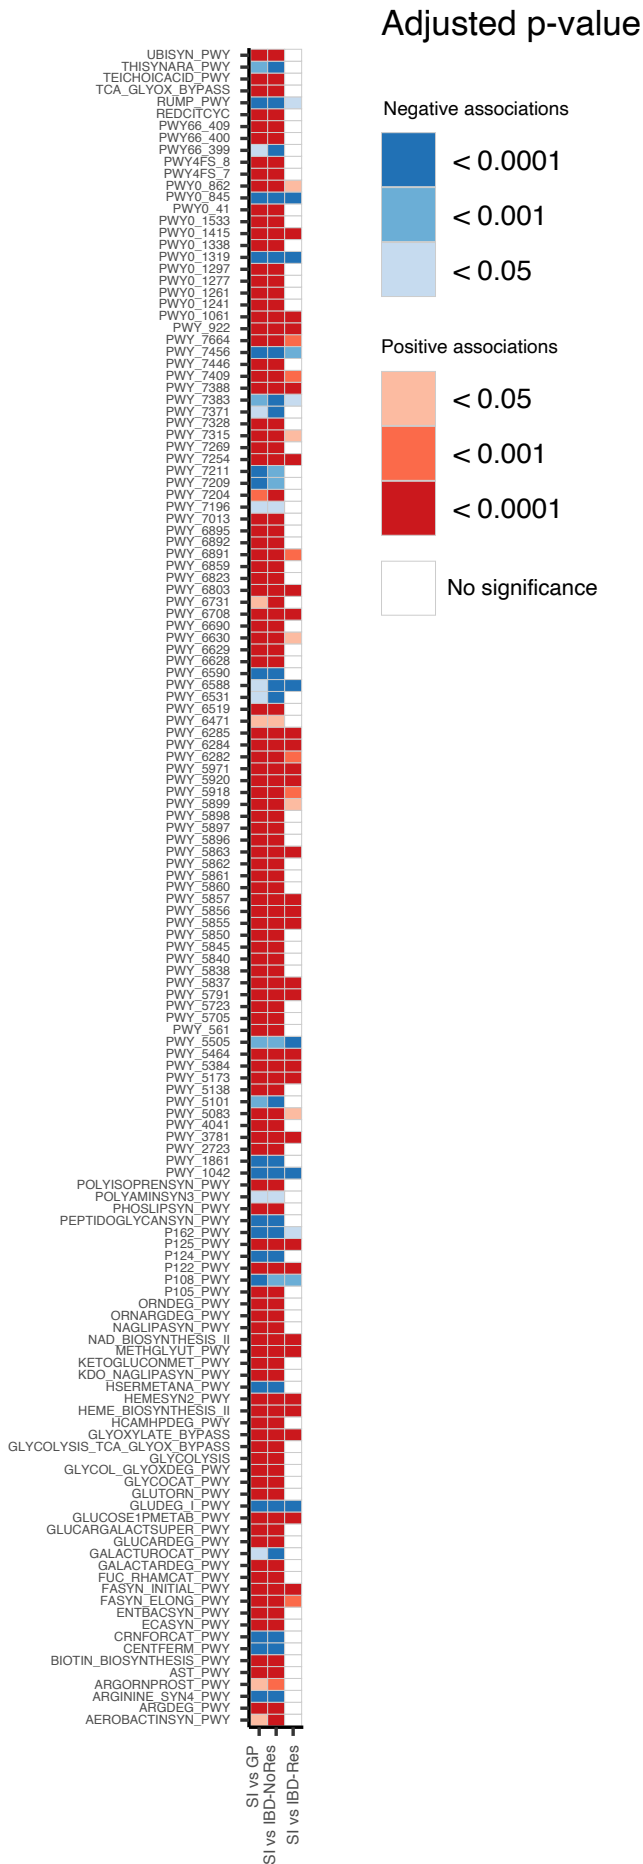

Supplement: jjab020_suppl_supplementary_figure.pdf [file jjab020_suppl_supplementary_figure.pdf]
