# Supplementary material for: The Composition and Metabolic Potential of the Human Small Intestinal Microbiota Within the Context of Inflammatory Bowel Disease
Source: PubMed Central journal article supplement — J Crohns Colitis. 2021 Jan 30;15(8):1326–38. doi: 10.1093/ecco-jcc/jjab020 (PMC8328293; doi:10.1093/ecco-jcc/jjab020), 2021-01-30
Supplement: jjab020_suppl_supplementary_table.pdf [file jjab020_suppl_supplementary_table.pdf]

|                                                                              | General Population                 |        | IBD*                               |        | IBD-SI                             |        | Wilcoxon test p-value        |                    |
|------------------------------------------------------------------------------|------------------------------------|--------|------------------------------------|--------|------------------------------------|--------|------------------------------|--------------------|
|                                                                              | Mean [SD] or Count [Proportion, %] | NA [n] | Mean [SD] or Count [Proportion, %] | NA [n] | Mean [SD] or Count [Proportion, %] | NA [n] | General Population vs IBD-SI | IBD* vs IBD-SI     |
| Number of samples [n]                                                        | 1178                               |        | 478                                |        | 57                                 |        |                              |                    |
| Sequencing read depth [SD]                                                   | 32919455 [12276237]                | 0      | 25031114 [10203888]                | 3      | 22828376 [10140543]                | 0      | <b>1.33E-09</b>              | 0.138995323        |
| Sex [female/male]                                                            | 689/489 [58/42%]                   | 0      | 285/193 [60/40%]                   | 0      | 42/15 [74/26%]                     | 0      | <b>0.022680447</b>           | <b>0.039735647</b> |
| Age at time of faecal sampling [SD]                                          | 45 [13.6]                          | 0      | 42.9 [12.8]                        | 0      | 45.2 [10.9]                        | 0      | 0.968143509                  | 0.131811149        |
| Body mass index [SD]                                                         | 25.3 [4.2]                         | 0      | 25.4 [5.0]                         | 6      | 26.4 [6.85]                        | 1      | 0.650352121                  | 0.630972528        |
| Faecal calprotectin level over 200 mg/kg [n/y] [%]                           | 1124/48 [96/4%]                    | 6      | 238/185 [56/44%]                   | 55     | 32/10 [76/24%]                     | 15     | <b>4.03E-09</b>              | <b>0.012657476</b> |
| C-reactive protein levels in mg/L divided by 5 [SD]                          | NA                                 | 1178   | 1.7 [1.9]                          | 2      | 1.75 [2.13]                        | 0      | NA                           | 0.695116431        |
| Current IBD diagnosis [CD/IBDU/LC] [%]                                       | NA                                 | 0      | 274/29/175 [57/6/37%]              | 0      | 23/1/33 [40/2/58%]                 | 0      | NA                           | <b>0.005233266</b> |
| Disease duration of IBD in years [SD]                                        | NA                                 | 1178   | 11.8 [8.8]                         | 8      | 16.6 [10.4]                        | 0      | NA                           | <b>0.000410007</b> |
| IBD disease activity – based on SCCAI and HBI scores [active/not active] [%] | NA                                 | 1178   | 114/358 [24/76%]                   | 6      | 5/52 [9/91%]                       | 0      | NA                           | <b>0.008679626</b> |
| Disease location of IBD [both/colon/ileum] [%]                               | NA                                 | 1178   | 111/221/97 [26/51/23%]             | 49     | 14/36/2 [27/69/4%]                 | 5      | NA                           | 0.05559574         |
| Ever had a stoma or ileoanal pouch [n/y] [%]                                 | NA                                 | 1178   | 446/32 [93/7%]                     | 0      | 0/57 [0/100%]                      | 0      | NA                           | <b>2.27E-71</b>    |
| Previous intestinal resections in IBD [n/y] [%]                              | NA                                 | 1178   | 309/169 [65/35%]                   | 0      | 0/57 [0/100%]                      | 0      | NA                           | <b>1.05E-20</b>    |
| Number of intestinal resections IBD [SD]                                     | NA                                 | 1178   | 0.82 [1.6]                         | 0      | 2.53 [2.28]                        | 2      | NA                           | <b>1.1E-18</b>     |
| Ileocecal valve in situ [n/y]                                                | NA                                 | 1178   | 123/351 [26/74%]                   | 4      | 52/3 [95/5%]                       | 2      | NA                           | <b>1.53E-24</b>    |
| Total stools formed per 24hrs [SD]                                           | 1.4 [0.7]                          | 47     | 2.65 [2.34]                        | 0      | 2.56 [3.77]                        | 0      | <b>0.001870973</b>           | <b>0.000157164</b> |
| Immunosuppressants use [n/y] [%]                                             | NA                                 | 1178   | 256/205 [56/44%]                   | 17     | 37/15 [71/29%]                     | 5      | NA                           | <b>0.031106634</b> |
| AntiTNFα use [n/y] [%]                                                       | NA                                 | 1178   | 357/121 [75/25%]                   | 0      | 50/7 [88/12%]                      | 0      | NA                           | <b>0.029402356</b> |
| Thiopurines use [n/y] [%]                                                    | NA                                 | 1178   | 319/159 [67/33%]                   | 0      | 51/6 [89/11%]                      | 0      | NA                           | <b>0.000447962</b> |
| Antidiarrhoea use [n/y] [%]                                                  | NA                                 | 1178   | 412/49 [89/11%]                    | 17     | 49/3 [94/6%]                       | 5      | NA                           | 0.271482266        |
| Bile acids use [n/y] [%]                                                     | NA                                 | 1178   | 437/24 [95/5%]                     | 17     | 49/3 [94/6%]                       | 5      | NA                           | 0.863254283        |
| ACE inhibitor use [n/y] [%]                                                  | NA                                 | 1178   | 1091/44 [96/4%]                    | 43     | 455/23 [95/5%]                     | 0      | 0.412227688                  | 0.292318977        |
| Angiotensin II receptor antagonist use [n/y] [%]                             | NA                                 | 1178   | 1101/34 [97/3%]                    | 43     | 467/11 [98/2%]                     | 0      | 0.825236536                  | 0.576077019        |
| Antihistamine use [n/y] [%]                                                  | NA                                 | 1178   | 1066/69 [94/6%]                    | 43     | 461/17 [96/4%]                     | 0      | 0.773224751                  | 0.203838823        |
| Antibiotics use [n/y] [%]                                                    | NA                                 | 1178   | 1165/13 [99/1%]                    | 0      | 467/11 [98/2%]                     | 0      | <b>0.006704643</b>           | 0.185885969        |
| Benzodiazepine derivatives use [n/y] [%]                                     | NA                                 | 1178   | 1107/28 [98/2%]                    | 43     | 459/19 [96/4%]                     | 0      | 0.62427707                   | 0.864119807        |
| Beta-blockers use [n/y] [%]                                                  | NA                                 | 1178   | 1115/63 [95/5%]                    | 0      | 443/35 [93/7%]                     | 0      | <b>0.00594789</b>            | 0.0783367          |
| Beta-sympathomimetic inhaler use [n/y] [%]                                   | NA                                 | 1178   | 1070/65 [94/6%]                    | 43     | 463/15 [97/3%]                     | 0      | 0.882948381                  | 0.400759801        |
| Bisphosphonates use [n/y] [%]                                                | NA                                 | 1178   | 1125/10 [99/1%]                    | 43     | 464/14 [97/3%]                     | 0      | <b>0.0000274</b>             | 0.105948295        |
| Calcium channel blocker use [n/y] [%]                                        | NA                                 | 1178   | 1114/21 [98/2%]                    | 43     | 470/8 [98/2%]                      | 0      | 0.374611026                  | 0.334008032        |
| Calcium use [n/y] [%]                                                        | NA                                 | 1178   | 1164/14 [99/1%]                    | 0      | 395/83 [83/17%]                    | 0      | <b>2.49E-18</b>              | 0.973008941        |
| Iron preparations use [n/y] [%]                                              | NA                                 | 1178   | 1171/7 [99/1%]                     | 0      | 460/18 [96/4%]                     | 0      | <b>7.34E-13</b>              | <b>0.019880859</b> |
| Folic acid use [n/y] [%]                                                     | NA                                 | 1178   | 1171/7 [99/1%]                     | 0      | 444/34 [93/7%]                     | 0      | <b>0.000000468</b>           | 0.978869397        |
| Laxatives use [n/y] [%]                                                      | NA                                 | 1178   | 1114/21 [99/1%]                    | 43     | 447/31 [94/6%]                     | 0      | <b>0.007918352</b>           | 0.88043045         |
| Mesalazines use [n/y] [%]                                                    | NA                                 | 1178   | 1129/6 [99/1%]                     | 43     | 310/168 [65/35%]                   | 0      | <b>2.17E-10</b>              | <b>0.0000582</b>   |
| Metformin use [n/y] [%]                                                      | NA                                 | 1178   | 1162/16 [99/1%]                    | 0      | 472/6 [99/1%]                      | 0      | 0.185963733                  | 0.185554342        |
| NSAID use [n/y] [%]                                                          | NA                                 | 1178   | 1093/42 [96/4%]                    | 43     | 448/30 [94/6%]                     | 0      | 0.940326774                  | 0.40539998         |
| Opiates use [n/y] [%]                                                        | NA                                 | 1178   | 1122/13 [99/1%]                    | 43     | 473/5 [99/1%]                      | 0      | 0.118446382                  | 0.122305559        |
| Oral contraceptive use [n/y] [%]                                             | NA                                 | 1178   | 1019/116 [90/10%]                  | 43     | 420/58 [88/12%]                    | 0      | <b>0.036135809</b>           | <b>0.018152845</b> |
| Oral steroid use [n/y] [%]                                                   | NA                                 | 1178   | 1173/5 [99/1%]                     | 0      | 384/94 [80/20%]                    | 0      | <b>1.05E-30</b>              | 0.702312302        |
| Antidepressants use [n/y] [%]                                                | NA                                 | 1178   | 1125/10 [99/1%]                    | 43     | 457/21 [96/4%]                     | 0      | <b>0.0000274</b>             | 0.375357542        |
| Paracetamol use [n/y] [%]                                                    | NA                                 | 1178   | 1166/12 [99/1%]                    | 0      | 434/44 [91/9%]                     | 0      | 0.082979844                  | 0.14742216         |
| Platelet aggregation inhibitor use [n/y] [%]                                 | NA                                 | 1178   | 1101/34 [97/3%]                    | 43     | 451/27 [94/6%]                     | 0      | 0.091814089                  | 0.676119002        |
| Proton pump inhibitor [n/y] [%]                                              | NA                                 | 1178   | 1079/99 [92/8%]                    | 0      | 366/112 [77/23%]                   | 0      | <b>2.64E-11</b>              | 0.053880957        |
| SSRI-antidepressant use [n/y] [%]                                            | NA                                 | 1178   | 1106/29 [97/3%]                    | 43     | 469/9 [98/2%]                      | 0      | 0.221991439                  | 0.29657215         |
| Statin use [n/y] [%]                                                         | NA                                 | 1178   | 1079/56 [95/5%]                    | 43     | 447/31 [94/6%]                     | 0      | 0.910998854                  | 0.720945956        |
| Steroid inhaler use [n/y] [%]                                                | NA                                 | 1178   | 1078/57 [95/5%]                    | 43     | 459/19 [96/4%]                     | 0      | 0.607418172                  | 0.864119807        |
| Steroid nose spray use [n/y] [%]                                             | NA                                 | 1178   | 1079/56 [95/5%]                    | 43     | 473/5 [99/1%]                      | 0      | 0.625700166                  | 0.122305559        |
| Thiazide diuretic use [n/y] [%]                                              | NA                                 | 1178   | 1092/43 [96/4%]                    | 43     | 466/12 [97/3%]                     | 0      | 0.426920135                  | 0.726271253        |
| Levothyroxine use [n/y] [%]                                                  | NA                                 | 1178   | 1109/26 [98/2%]                    | 43     | 468/10 [98/2%]                     | 0      | 0.553695825                  | 0.495158799        |
| Tricyclic antidepressant use [n/y] [%]                                       | NA                                 | 1178   | 1124/11 [99/1%]                    | 43     | 467/11 [98/2%]                     | 0      | 0.455430863                  | 0.247608241        |
| Triptans use [n/y] [%]                                                       | NA                                 | 1178   | 1115/20 [98/2%]                    | 43     | 473/5 [99/1%]                      | 0      | 0.312355796                  | 0.438298036        |
| Vitamin B12 use [n/y] [%]                                                    | NA                                 | 1178   | 1168/10 [99/1%]                    | 0      | 387/91 [81/19%]                    | 0      | <b>5.01E-33</b>              | 0.497073848        |
| Vitamin D [n/y] [%]                                                          | NA                                 | 1178   | 1164/14 [99/1%]                    | 0      | 403/75 [84/16%]                    | 0      | <b>1.2E-27</b>               | 0.171099283        |
